# Supplementary figures and images for: Calcified Catheter-Related Fibrin Sheath Forms Large Intravenous Cast In Hemodialysis Patient Causing Embolic Sequalae: A Case Report
Source: Research Square preprint supplement (doi:10.21203/rs.3.rs-388142/v1), 2021-05-18

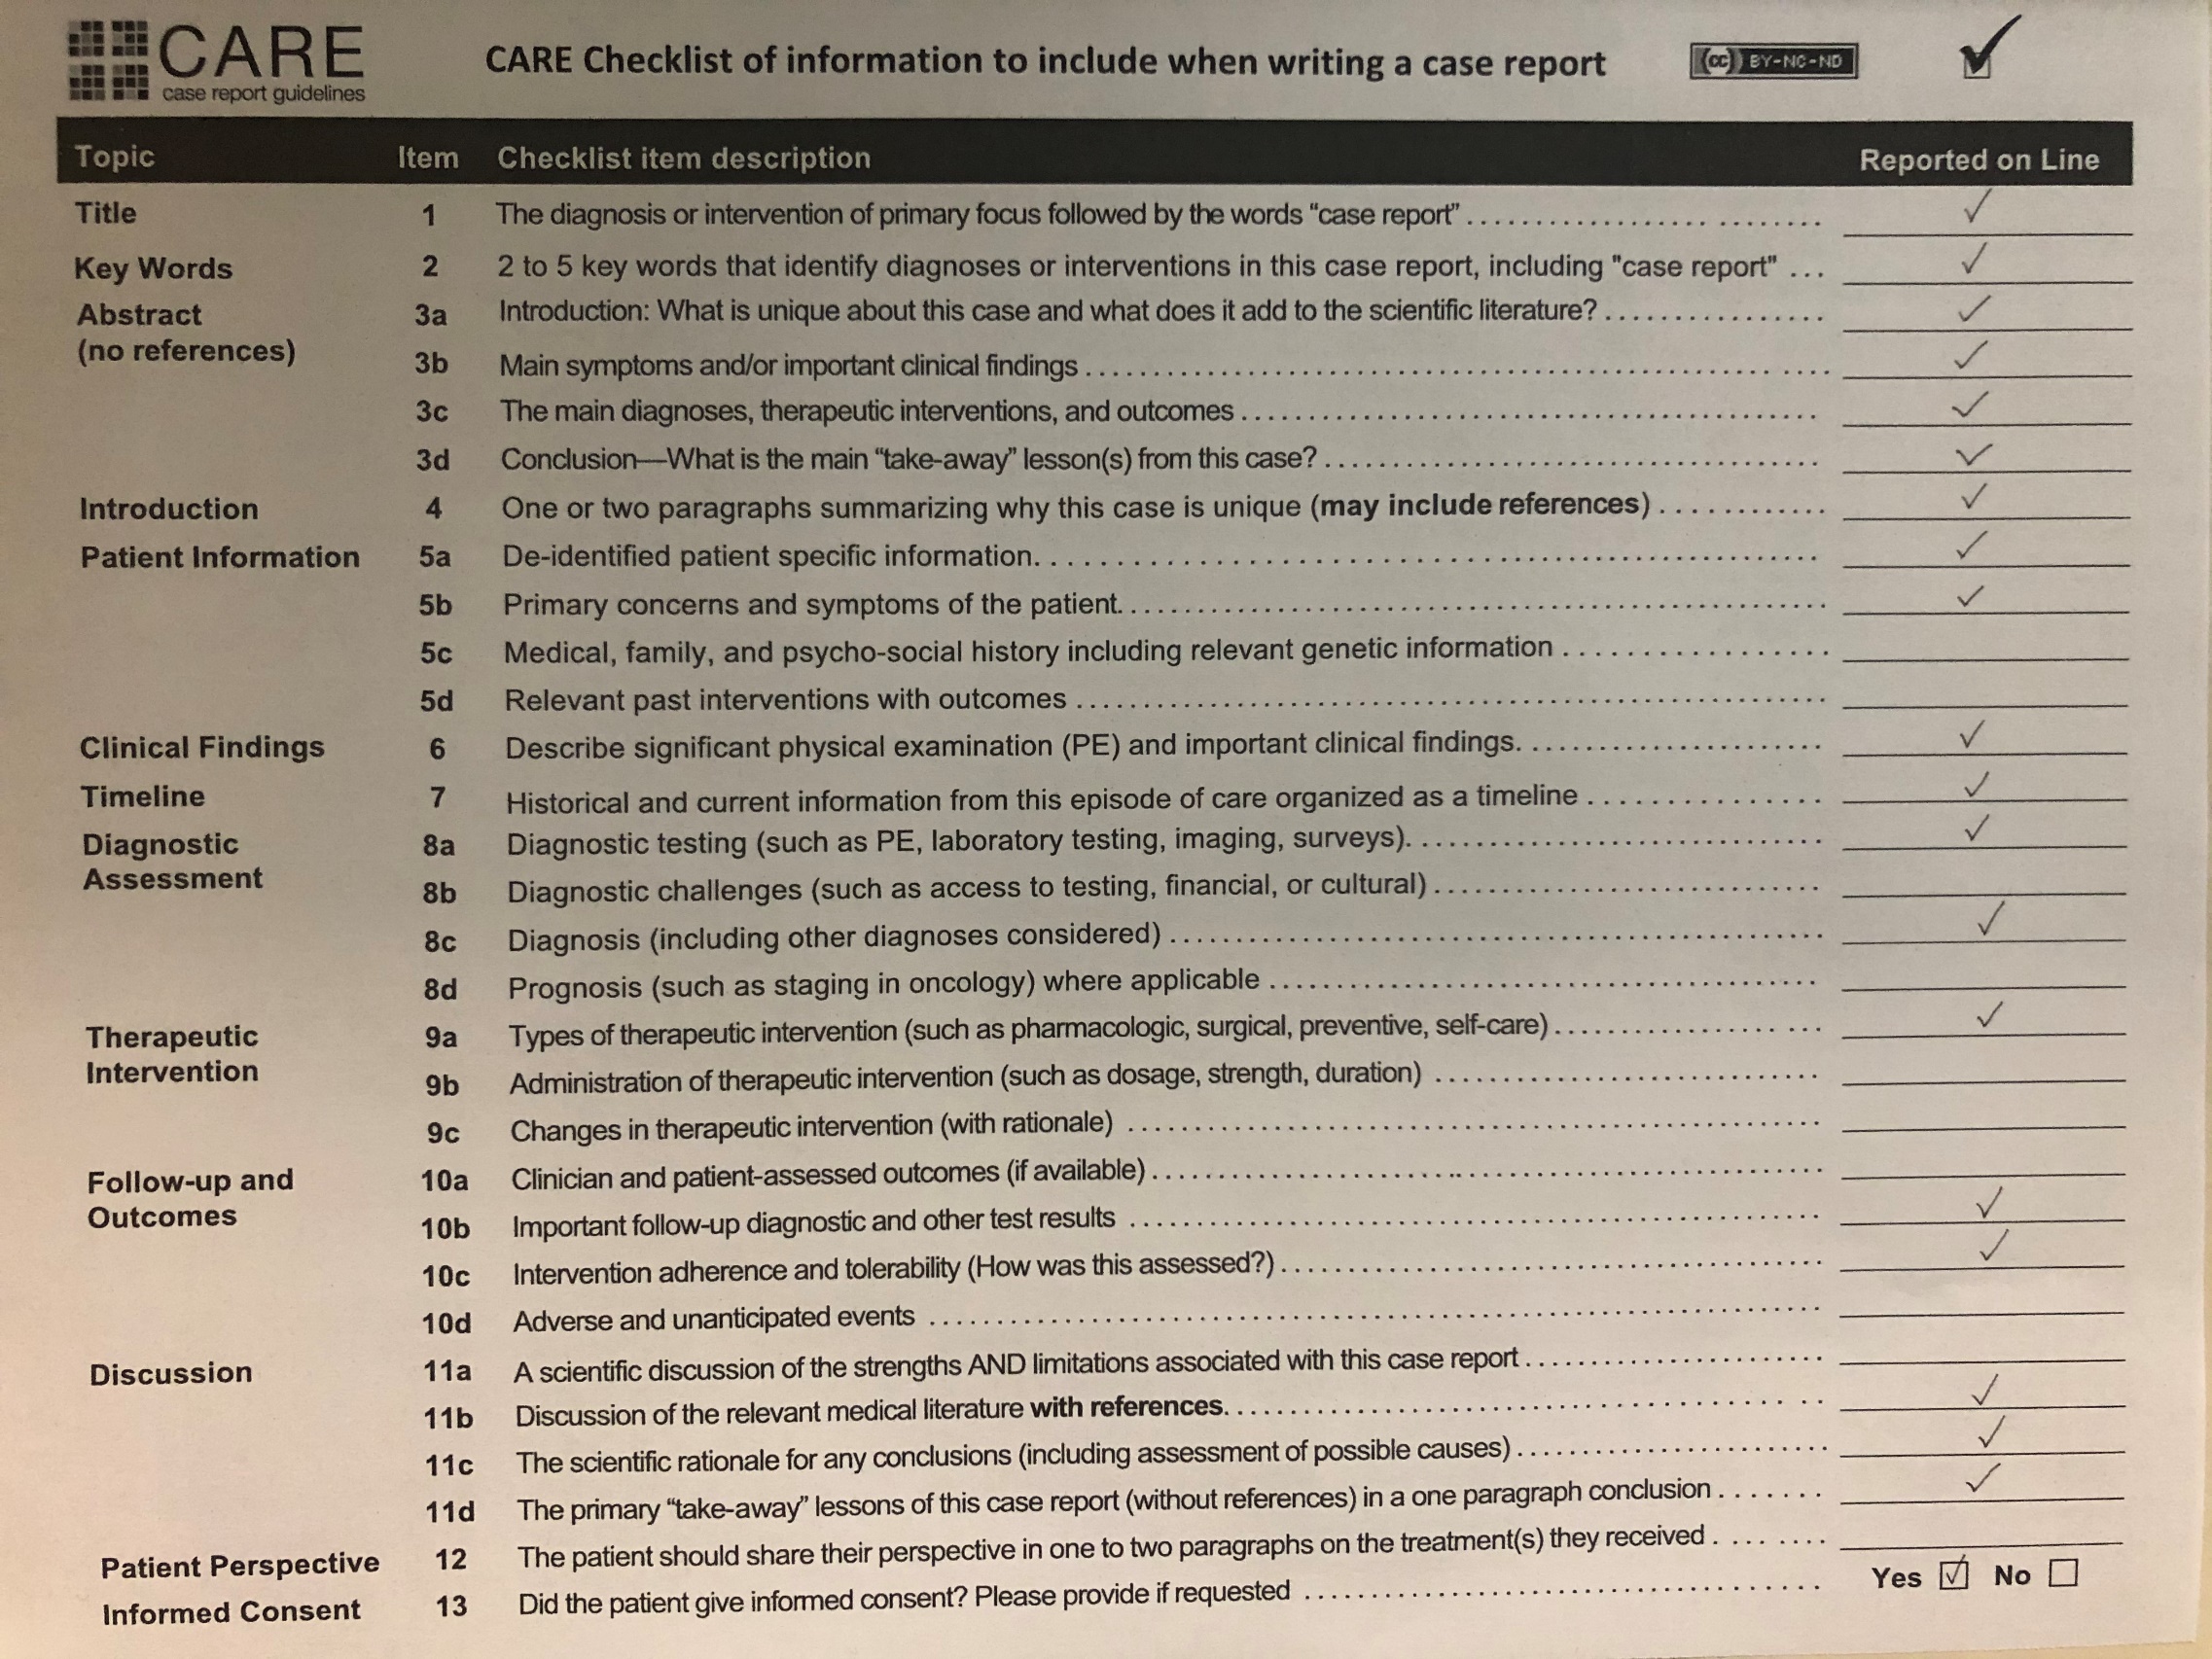

Supplement: Supplementary file 1 [file db4177fe880efe865af49a76.docx]
